# Supplementary material for: Enhanced photoresponse through van der Waals heterostructure integration: p-GaSe and n-MoSe2 on h-BN substrate
Source: Royal Society of Chemistry journal article supplement (doi:10.1039/d4tc02167c), 2024-01-01
Supplement: d4tc02167c1.pdf [file d4tc02167c1.pdf]

## "Advancing Photodetection in MoSe<sub>2</sub>:GaSe Heterostructures developed on h-BN

### Substrates

#### Supplementary:

In the supplementary portion, we perform the crystal study of MoSe<sub>2</sub> and GaSe (Figure S1). The temperature-dependent electrical measurements on the junction devices (metal–TMD material–metal). The results were as illustrated in Figure S2 (a) and S2 (b). We have represented the photocurrent  $I_{ph}$  as a function of the drain-source voltage  $V_{ds}$  for a heterojunction device under different incident laser powers in Figure S3.

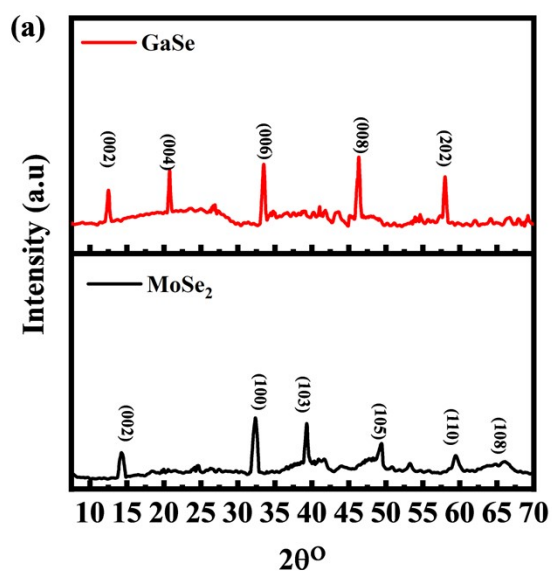

**Figure S1.** Represents the XRD pattern for MoSe<sub>2</sub> and GaSe.

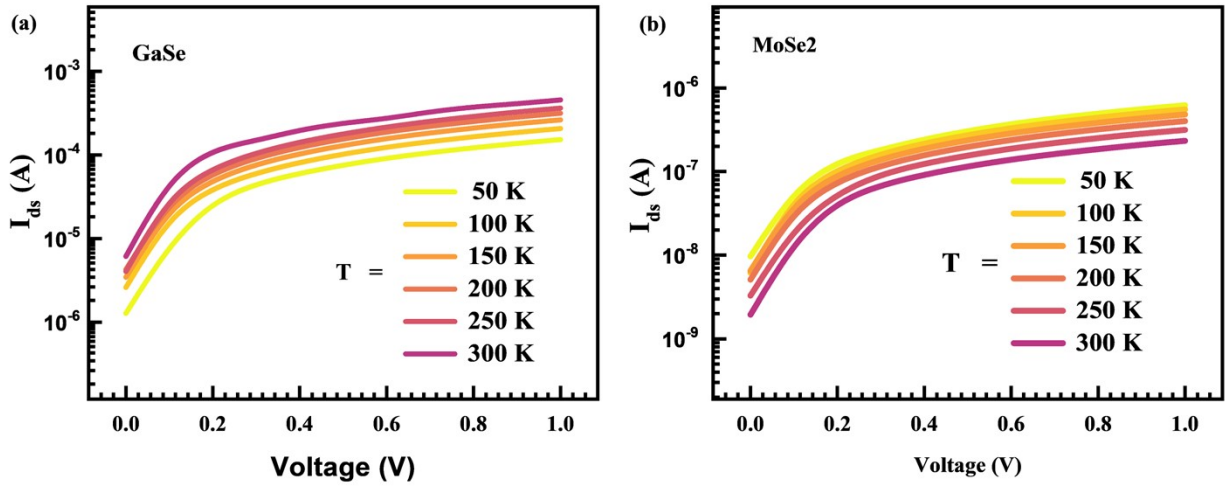

**Figure S2.** (a) temperature-dependent electrical measurements on the junction devices GaSe and MoSe<sub>2</sub>, respectively.

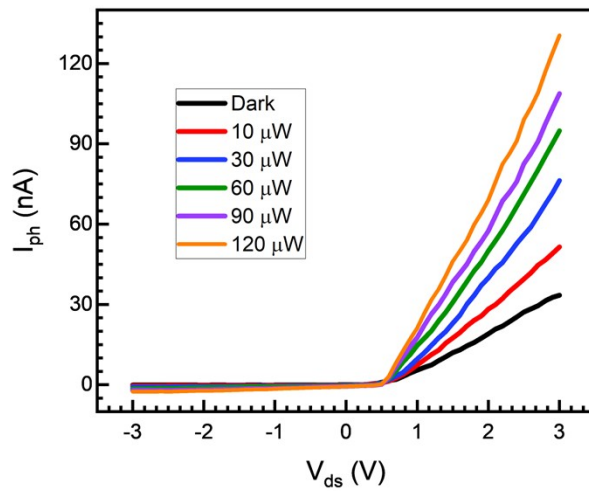

**Figure S3.** Represents the photocurrent  $I_{ph}$  as a function of the drain-source voltage  $V_{ds}$  for a heterojunction device under different incident laser powers
